# Supplementary material
Source: PubMed Central journal article supplement (PMC3992700)
Supplement: 1323156111_pnas.201323156SI.pdf [file 1323156111_pnas.201323156SI.pdf]

# Supporting Information

Carstensen et al. 10.1073/pnas.1323156111

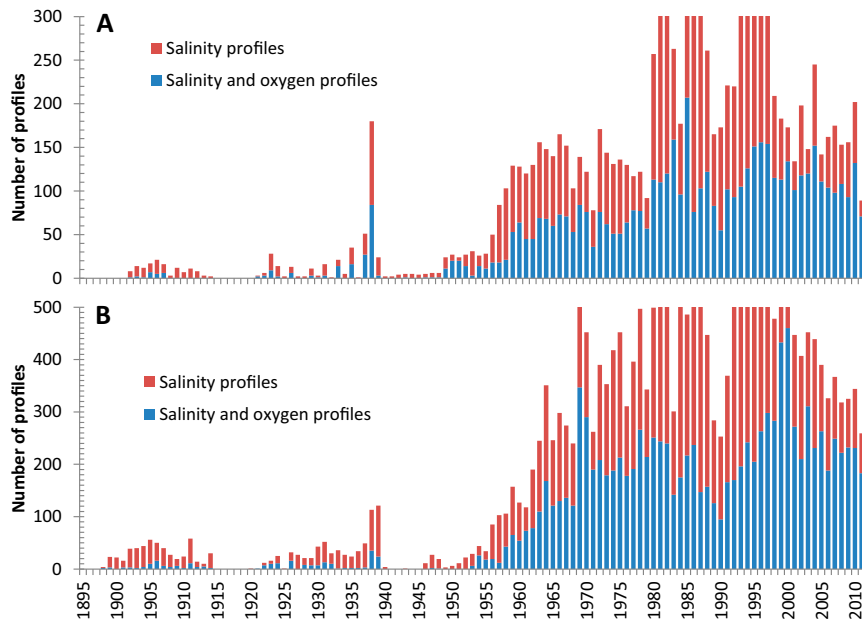

**Fig. S1.** Number of deep profiles for salinity and oxygen through time. Bornholm Basin (A) and Gotland Basin (B). Profiles with sufficient number of samples below the halocline were used for estimating trends of hypoxia in the Bornholm Basin and the Gotland Basin. Note that the second axes have a maximum cutoff to better display the lower number of counts in the early part of the time series.

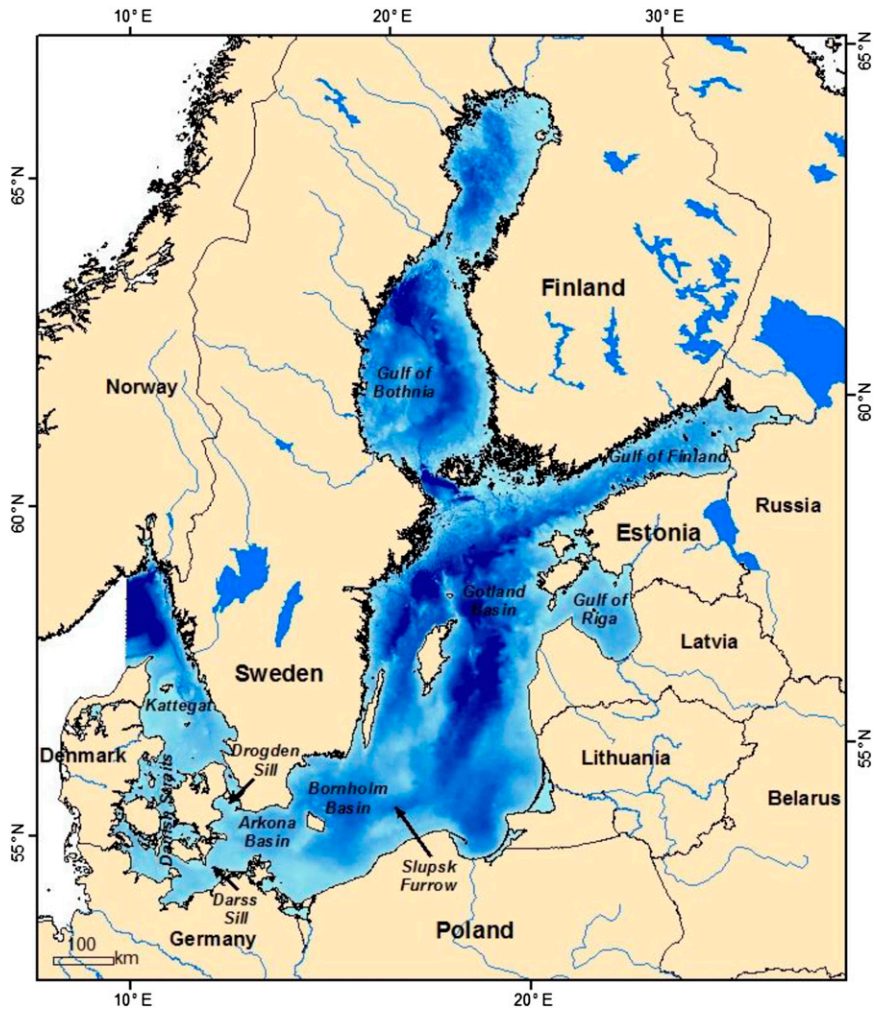

Fig. S2. Bathymetry of the Baltic Sea with the different regions indicated.















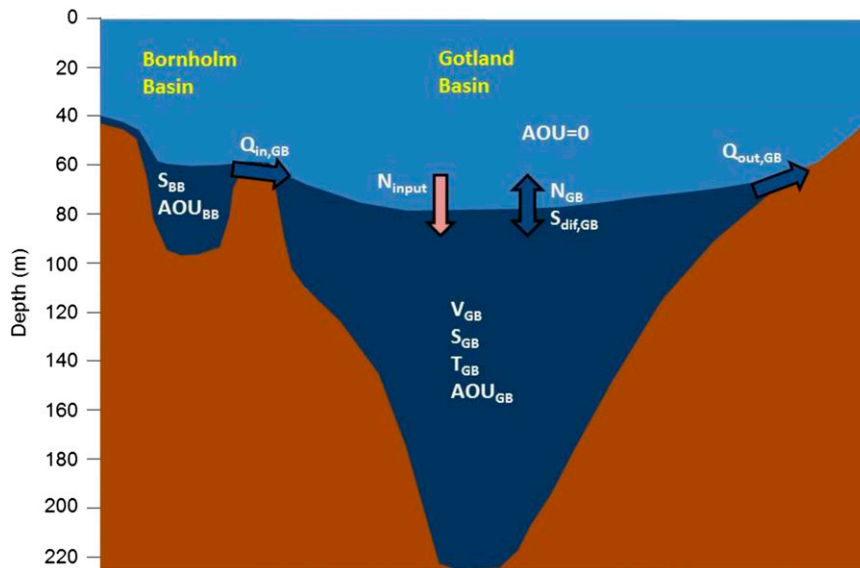

Fig. S9. Conceptual model for salt and oxygen budgets in the Gotland Basin. Notation for flows, volume, and concentrations follows the mass balances without time index.

Table S1. Parameter estimates and fit statistics from time series models of  $\Delta TAOU_{GB}(t)$

| Parameter/statistic | Unit                                        | Nitrogen input for oxygen consumption | Phosphorus input for oxygen consumption |
|---------------------|---------------------------------------------|---------------------------------------|-----------------------------------------|
| $\hat{a}_{BV,GB}$   | $m^3 \cdot s^{-2}$                          | 0.196                                 | 0.195                                   |
| $\hat{a}_{0,GB}$    | $10^{12} \text{ g O}_2 \cdot \text{y}^{-1}$ | 1.08                                  | 1.28                                    |
| $\hat{a}_{N,GB}$    | —                                           | 0.083                                 | 0.246                                   |
| $Q_{10,GB}$         | —                                           | 3.66                                  | 2.82                                    |
| $R^2$               | —                                           | 0.642                                 | 0.645                                   |
| MSE                 | $10^{12} \text{ g O}_2$                     | 0.550                                 | 0.548                                   |

The oxygen consumption term was linearly related to nutrient inputs from land and atmosphere, either total nitrogen or total phosphorus. The parameter  $\hat{a}_{N,GB}$  was scaled by stoichiometry and Redfield ratios to describe the proportion of nutrient input leading to oxygen consumption in the deep waters. For both models,  $n = 78$  observations were used in the estimation. MSE, mean squared error.

Table S2. Data sources for the analysis of hypoxia in the Baltic Sea

| Country       | Data host                                                                                       |
|---------------|-------------------------------------------------------------------------------------------------|
| Denmark       | Danish Centre for Environment, Aarhus University                                                |
| Estonia       | Estonian Marine Institute, Tallinn                                                              |
| Finland       | Finnish Environment Institute, Helsinki                                                         |
| Germany       | Institute of Oceanography, Warnemünde<br>Bundesamt für Seeschifffahrt und Hydrographie, Hamburg |
| International | ICES, Copenhagen, Denmark                                                                       |
| Latvia        | Latvian Institute of Aquatic Ecology, Riga                                                      |
| Lithuania     | Environmental Protection Agency, Vilnius                                                        |
| Poland        | Chief Inspectorate for Environmental Protection, Warsaw                                         |
| Russia        | Russian Academy of Sciences, St. Petersburg                                                     |
| Sweden        | Swedish Meteorological and Hydrological Institute, Gothenburg                                   |

These data sources were made available through the Baltic Nest Institute's Baltic Environmental Database (BED) (<http://nest.su.se>). In addition to the monitoring data, profiles from various research cruises, submitted to BED and International Council for Exploration of the Seas (ICES), were used.
